# Supplementary material for: Artificial Intelligence Based Patient-Specific Preoperative Planning Algorithm for Total Knee Arthroplasty
Source: PubMed Central journal article supplement (PMC8957999; doi:10.3389/frobt.2022.840282), 2022-03-08
Supplement: DataSheet1.pdf [file DataSheet1.pdf]

## Supplementary Material

### 1 DATA DESCRIPTION

**Table S1.** An overview of the number of cases for each surgeon and the implant brand they use.

| <b>Surgeon ID</b> | <b>Number of cases</b> | <b>Implant system</b> |
|-------------------|------------------------|-----------------------|
| Surgeon 1         | 75                     | Persona               |
| Surgeon 2         | 76                     | Persona               |
| Surgeon 3         | 92                     | NexGen                |
| Surgeon 4         | 93                     | Vanguard              |
| Surgeon 5         | 94                     | Persona               |
| Surgeon 6         | 96                     | Persona               |
| Surgeon 7         | 99                     | Persona               |
| Surgeon 8         | 99                     | Vanguard              |
| Surgeon 9         | 101                    | Vanguard              |
| Surgeon 10        | 102                    | Persona               |
| Surgeon 11        | 103                    | Persona               |
| Surgeon 12        | 104                    | Vanguard              |
| Surgeon 13        | 104                    | Persona               |
| Surgeon 14        | 104                    | Vanguard              |
| Surgeon 15        | 105                    | Persona               |
| Surgeon 16        | 106                    | Vanguard              |
| Surgeon 17        | 108                    | Vanguard              |
| Surgeon 18        | 108                    | Vanguard              |
| Surgeon 19        | 110                    | Persona               |
| Surgeon 20        | 112                    | Vanguard              |
| Surgeon 21        | 115                    | Vanguard              |
| Surgeon 22        | 115                    | Vanguard              |
| Surgeon 23        | 121                    | Vanguard              |
| Surgeon 24        | 123                    | Persona               |
| Surgeon 25        | 127                    | Persona               |
| Surgeon 26        | 129                    | Persona               |
| Surgeon 27        | 131                    | Vanguard              |
| Surgeon 28        | 133                    | Vanguard              |
| Surgeon 29        | 142                    | Vanguard              |
| Surgeon 30        | 149                    | Vanguard              |
| Surgeon 31        | 151                    | Persona               |
| Surgeon 32        | 152                    | Vanguard              |
| Surgeon 33        | 155                    | Persona               |
| Surgeon 34        | 160                    | Persona               |
| Surgeon 35        | 176                    | Vanguard              |
| Surgeon 36        | 176                    | Vanguard              |
| Surgeon 37        | 180                    | Vanguard              |
| Surgeon 38        | 218                    | Persona               |
| Surgeon 39        | 237                    | Vanguard              |

## 2 FEATURE DESCRIPTION

**Table S2.** List of all landmark points with their description and the coordinate system in which they are defined.

| <b>Landmark name</b> | <b>Description</b>                                                                                          | <b>Coordinate system</b> |            |
|----------------------|-------------------------------------------------------------------------------------------------------------|--------------------------|------------|
| pt_notch             | Most anterior point on the femur at the height of the superior tip of the femoral implant's anterior flange | Femoral system           | coordinate |
| pt_piri_fossa        | Most medial point of the piriformis fossa of the femur                                                      | Femoral system           | coordinate |
| pt_fem_head          | Center point of the femoral head                                                                            | Femoral system           | coordinate |
| pt_dislat_cart       | Most distal point on the cartilage of the lateral femoral epicondyle                                        | Femoral system           | coordinate |
| pt_dismed_cart       | Most distal point on the cartilage of the medial femoral epicondyle                                         | Femoral system           | coordinate |
| pt_poslat            | Most posterior point on the lateral epicondyle of the femoral bone                                          | Femoral system           | coordinate |
| pt_poslat_cart       | Most posterior point on the cartilage of the lateral epicondyle of the femur                                | Femoral system           | coordinate |
| pt_posmed            | Most posterior point on the medial epicondyle of the femoral bone                                           | Femoral system           | coordinate |
| pt_posmed_cart       | Most posterior point on the cartilage of the medial epicondyle of the femur                                 | Femoral system           | coordinate |
| pt_trochlea          | The most distal point on the femoral trochlea region                                                        | Femoral system           | coordinate |
| pt_trochlea_cart     | The most distal point on the femoral cartilage trochlea region                                              | Femoral system           | coordinate |
| pt_lat_tub           | The lateral most point on the superior edge of the tibial tuberosity                                        | Tibial system            | coordinate |
| pt_med_tub           | The medial most point on the superior edge of the tibial tuberosity                                         | Tibial system            | coordinate |
| pt_malleolus         | The center point between the medial and lateral malleolus at the superior tip of the talus                  | Tibial system            | coordinate |
| pt_lat_spine         | The most superior point of the lateral spine point of the tibia                                             | Tibial system            | coordinate |
| pt_med_spine         | The most superior point of the medial spine point of the tibia                                              | Tibial system            | coordinate |
| pt_med_tibia         | Most medial point on the tibial plateau                                                                     | Tibial system            | coordinate |
| pt_med_pcl           | Most medial point of the posterior cruciate ligament insertion region on the tibial plateau                 | Tibial system            | coordinate |
| pt_lat_pcl           | Most lateral point of the posterior cruciate ligament insertion region on the tibial plateau                | Tibial system            | coordinate |
| pt_canal             | Center of the central point of the intramedullary canal of the tibia proximal to the tibial tuberosity      | Tibial system            | coordinate |
| pt_spine             | The center point between the medial and lateral tibial spine points                                         | Tibial system            | coordinate |
| pt_lat_prox_cart     | The most proximal point on the cartilage of the lateral tibial plateau                                      | Tibial system            | coordinate |
| pt_med_prox_cart     | The most proximal point on the cartilage of the medial tibial plateau                                       | Tibial system            | coordinate |
| pt_fib               | The most proximal point of the fibula                                                                       | Tibial system            | coordinate |
| pt_lat_plateau       | The most distal point on the cartilage of the lateral tibial plateau                                        | Tibial system            | coordinate |
| pt_med_plateau       | The most distal point on the cartilage of the medial tibial plateau                                         | Tibial system            | coordinate |

**Table S3.** A list of all measurements and their description which are used as features in the model.

| Measurement                                | Description                                                                                                                                                           |
|--------------------------------------------|-----------------------------------------------------------------------------------------------------------------------------------------------------------------------|
| Femur implant size                         | Femoral implant size in the MPP                                                                                                                                       |
| Femoral distal resection                   | Femoral distal resection depth in the MPP                                                                                                                             |
| Femoral posterior resection                | Femoral posterior resection depth in the MPP                                                                                                                          |
| Femoral implant flexion/extension angle    | Femoral implant flexion/extension rotation angle in the MPP                                                                                                           |
| Femoral implant internal/external rotation | Femoral implant internal/external rotation angle in the MPP                                                                                                           |
| Femoral implant varus/valgus angle         | Femoral implant varus/valgus rotation angle in the MPP                                                                                                                |
| Tibial implant size                        | Tibial implant size in the MPP                                                                                                                                        |
| Tibial proximal resection                  | Tibial proximal resection level in the MPP                                                                                                                            |
| Tibial implant posterior slope             | Tibial implant posterior slope in the MPP                                                                                                                             |
| Tibial implant internal/external rotation  | Tibial implant internal/external rotation angle in the MPP                                                                                                            |
| Tibial implant varus/valgus angle          | Tibial implant varus/valgus rotation angle in the MPP                                                                                                                 |
| Leg side                                   | Side of the leg being operated on (left or right)                                                                                                                     |
| Notching distance                          | To distance from the superior tip of the anterior femoral implant flange to the femoral bone                                                                          |
| Femoral width                              | The distance between the MCL and LCL attachment points on the femur                                                                                                   |
| posterior - AP axes angle                  | Angle between the femoral anteroposterior axis and the posterior axis in the distal cut plane defined in the MPP                                                      |
| epicondylar-posterior angle                | Angle between the epicondylar axis and the posterior cut plane defined in the MPP                                                                                     |
| Distal lateral resection depth             | Distal resection depth on the lateral femoral epicondyle including the cartilage layer, measured in the MPP                                                           |
| Distal medial resection depth              | Distal resection depth on the medial femoral epicondyle including the cartilage layer, measured in the MPP                                                            |
| epicondylar axis length                    | Distance between the medial and lateral epicondyle points                                                                                                             |
| Posterior lateral resection depth          | Posterior resection depth on the lateral femoral epicondyle including the cartilage layer, measured in the MPP                                                        |
| Posterior medial resection depth           | Posterior resection depth on the medial femoral epicondyle including the cartilage layer, measured in the MPP                                                         |
| Hip knee ankle angle                       | Angle between the mechanical axes of the femur and tibia                                                                                                              |
| Proximal lateral resection depth           | The resection depth on the proximal tibia including cartilage measured on the lateral side, measured in the MPP                                                       |
| Proximal medial resection depth            | The resection depth on the proximal tibia including cartilage measured on the medial side, measured in the MPP                                                        |
| Femoral valgus angle                       | The angle between the femoral mechanical and anatomical axis                                                                                                          |
| Femoral implant overhang                   | Femoral implant overhang measured as the difference between the width of the femoral implant and the width of the femoral distal cut surface                          |
| Tibial implant mediolateral overhang       | Tibial mediolateral implant overhang measured as the difference between the width of the tibial implant and the width of the tibial proximal cut surface              |
| Tibial implant anteroposterior overhang    | Tibial anteroposterior implant overhang measured as the difference between the length of the tibial implant and the maximal length of the tibial proximal cut surface |
| Femur SSM Coefficients 1 - 15              | The first 15 femoral shape coefficients explaining most of the femoral shape variation.                                                                               |
| Tibia SSM Coefficients 1 - 15              | The first 15 tibial shape coefficients explaining most of the tibial shape variation.                                                                                 |
